# Supplementary material for: Propensity-Matched Study of Early Cardiac Rehabilitation in Patients With Acute Decompensated Heart Failure
Source: PubMed Central journal article supplement — Circ Heart Fail. 2023 Apr 7;16(4):e010320. doi: 10.1161/CIRCHEARTFAILURE.122.010320 (PMC10101139; doi:10.1161/circheartfailure.122.010320), 2023-04-07
Supplement: hhf-16-e010320-s001.pdf [file hhf-16-e010320-s001.pdf]

# **SUPPLEMENTAL MATERIAL**

1 **Supplemental Methods**

2 **Translation of Guidelines for Rehabilitation in Patients with Cardiovascular Disease**

3 **(JCS 2012) with some modification**

4 **Reference: [https://www.jacr.jp/pdf/JCS2012\\_nohara\\_d\\_2015.01.14.pdf](https://www.jacr.jp/pdf/JCS2012_nohara_d_2015.01.14.pdf)**

5

6 **Purpose of cardiac rehabilitation in patients with acute heart failure**

7 1. Prevent further physical deconditioning

8 2. Make sure hospital discharge with stable condition

9 3. Improve QOL by improving exercise tolerance

10 4. Prevent heart failure exacerbation through patient education and disease control

11 5. Motivate patients to continue exercise

12

13 **Ambulation program**

14 Once hemodynamics is stabilized and there is no symptom at rest, even if during intravenous

15 inotrope therapy, the ambulation program should proceed from the early stage of

16 hospitalization. The ambulation program includes stretching, sitting upright, walk within room

17 (10 m), walk to toilet (40 m), and walk within ward (80 m). These programs were conducted

18 under monitoring of vital signs and symptoms. After completion of ambulation program, then

1 move on to the exercise program.

2

### 3 **Exercise program**

4 Cardiologists decide whether patients safely proceed to the exercise program, and the program

5 is performed according to the exercise prescription, which are created based on clinical

6 parameters or cardiopulmonary exercise testing. The program should be performed under

7 supervision with electrocardiogram monitoring. The strength and type of program are listed

8 below.

9

|          |                                                                                                                                                                                                   |
|----------|---------------------------------------------------------------------------------------------------------------------------------------------------------------------------------------------------|
| Type     | Walking, ergometer, aerobic exercise, and low-level resistance training                                                                                                                           |
| Strength | [Initial phase]<br><br>Walking 50-80 m/min or ergometer 10-20 W * 5-10 minutes<br><br>Increment strength and time based on symptoms and vital signs                                               |
|          | [Stable phase]<br><br>a. 40-60% of peak VO <sub>2</sub> or heart rate at aerobic threshold (AT)<br><br>b. 30-50% of heart rate reserve or 50-70% of maximum heart rate<br><br>c. Borg scale 11-13 |
| Time     | 5-10 minutes * 2 times/day                                                                                                                                                                        |

|           |                                |
|-----------|--------------------------------|
|           | Increment to 30-60 minutes/day |
| Frequency | 3-5/weeks                      |

1

2

### 3 **Sensitivity analyses**

4 To avoid selection bias attributable to propensity score matching, we also used multivariable  
5 Cox regression analysis including variables used in the propensity score matching. In order to  
6 exclude potential bias caused by quality of treatment which differed between institution (e.g.  
7 institute which perform cardiac rehabilitation (CR) might provide better management than  
8 institutes which did not), we did the same multivariable analysis after excluding institution  
9 which did not provide CR. We also conducted multivariable analysis including outpatient CR  
10 as a covariate on top of the covariates used in the propensity score matching.

11 The analysis of outcomes by using combination of multiple imputation and inverse  
12 probability of treatment weighting was also conducted to assess the effects of missing data.<sup>18</sup>  
13 For the all baseline missing data, multiple imputation was performed (number of imputation =  
14 10) by predictive mean matching for continuous variables and logistic regression model for  
15 binary variables. A propensity score was estimated by fitting a logistic-regression model which  
16 adjusted for all baseline covariates in each dataset. HR for outcomes was estimated by inverse

1 probability weighting in each imputed dataset. Estimates from 10 iterations were combined  
2 with the use of Rubin's rule. For comparison, we conducted univariate analysis in the dataset  
3 used in the multivariable analysis. Pearson correlation coefficient were calculated to test the  
4 correlation between CR and other baseline covariates. We also conducted a negative control  
5 analysis. In JROADHF, three types of non-cardiac death events were recorded, pneumonia,  
6 malignancy and other non-cardiac death. Given that pneumonia death is sometimes difficult to  
7 distinguish from HF death and rehabilitation might prevent pneumonia death, we chose  
8 malignancy and other non-cardiac death as negative controls. This outcome was analyzed with  
9 unadjusted analysis, propensity score matched analysis, multivariable analysis, and multiple  
10 imputation analysis as described above.

11

12

## 1 Supplemental Figures

## 2 Figure S1. Subgroup analysis

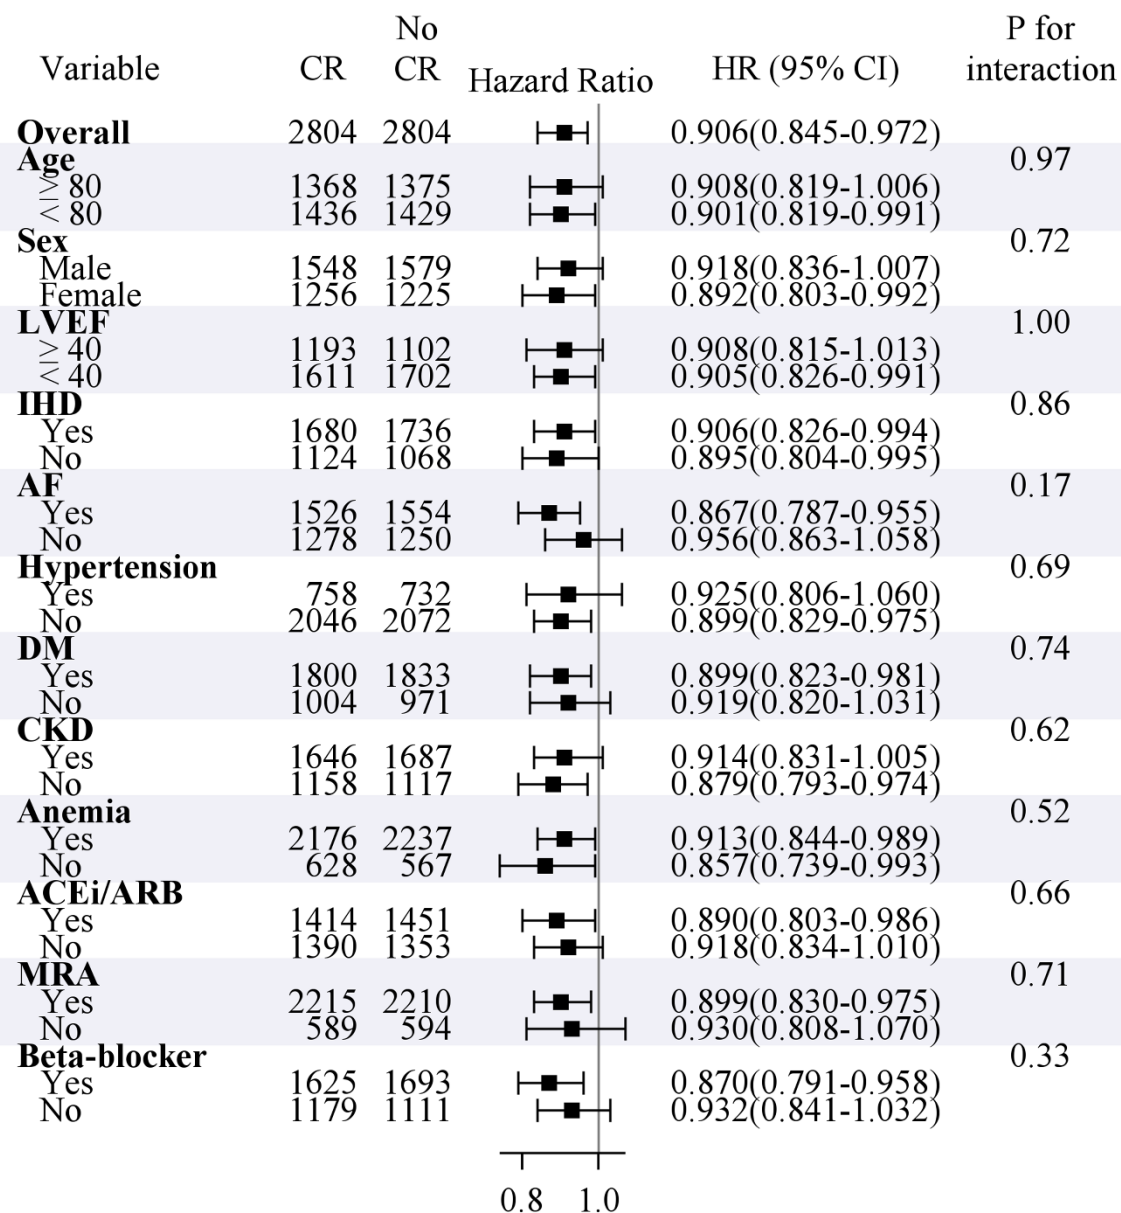

← Rehabilitation better      No rehabilitation better →

3  
4 ACEi, angiotensin-converting-enzyme inhibitor; ARB, angiotensin II receptor blocker;  
5 AF, atrial fibrillation; CI, confidence interval; CKD, chronic kidney disease; CR,  
6 cardiac rehabilitation; DM, diabetes mellitus; HR, hazard ratio; IHD, ischemic heart  
7 disease; LVEF, left ventricular ejection fraction; MRA, mineralocorticoid receptor  
8 antagonist.

9

1 **Supplemental Tables**2 **Table S1.** Fine and Gray model in the propensity matched cohort

| Outcomes                       | HR (95% CI)         | P value |
|--------------------------------|---------------------|---------|
| CV death or CV event admission | 0.901 (0.840-0.966) | 0.003   |
| CV death                       | 0.913 (0.814-1.025) | 0.12    |
| CV event admission             | 0.905 (0.841-0.974) | 0.008   |

3

4 CI, confidence interval; CV, cardiovascular; HR, hazard ratio.

5

6

1 **Table S2.** Sensitivity analyses

| Outcomes                       | HR (95% CI)         | P value |
|--------------------------------|---------------------|---------|
| Multivariable analysis         |                     |         |
| CV death or CV event admission | 0.935 (0.879-0.995) | 0.035   |
| CV death                       | 0.950 (0.856-1.053) | 0.33    |
| CV event admission             | 0.935 (0.876-0.998) | 0.042   |
| Multiple imputation            |                     |         |
| CV death or CV event admission | 0.941 (0.907-0.977) | 0.001   |
| CV death                       | 0.947 (0.891-1.008) | 0.090   |
| CV event admission             | 0.948 (0.911-0.986) | 0.007   |

2

3

CI, confidence interval; CV, cardiovascular; HR, hazard ratio.

4

5



1 **Table S3.** Multivariable analysis limited to institutions which provide cardiac  
2 rehabilitation

| Outcomes                       | HR (95% CI)         | P value |
|--------------------------------|---------------------|---------|
| CV death or CV event admission | 0.930 (0.868-0.996) | 0.038   |
| CV death                       | 0.984 (0.876-1.105) | 0.78    |
| CV event admission             | 0.940 (0.874-1.011) | 0.094   |

3 CI, confidence interval; CV, cardiovascular; HR, hazard ratio.

4

1 **Table S4.** Multivariable analysis including outpatient cardiac rehabilitation as a  
2 covariate

| Outcomes                       | HR (95% CI)         | P value |
|--------------------------------|---------------------|---------|
| CV death or CV event admission | 0.924 (0.859-0.994) | 0.035   |
| CV death                       | 0.981 (0.864-1.115) | 0.77    |
| CV event admission             | 0.921 (0.853-0.993) | 0.033   |

3 CI, confidence interval; CV, cardiovascular; HR, hazard ratio.

4

1 **Table S5.** Correlation coefficient between cardiac rehabilitation and other baseline  
 2 variables.

| Variables                        | Correlation coefficient |
|----------------------------------|-------------------------|
| <b>Demographics</b>              |                         |
| Age, years                       | 0.018                   |
| Male                             | -0.004                  |
| Prior HF admission               | -0.006                  |
| NYHA III-IV                      | 0.038                   |
| Smoking                          | 0.000                   |
| <b>Vital signs</b>               |                         |
| SBP, mmHg                        | -0.006                  |
| Heart rate, bpm                  | 0.022                   |
| <b>Etiology of heart failure</b> |                         |
| Ischemic                         | 0.044                   |
| Cardiomyopathy                   | 0.023                   |
| Hypertensive                     | -0.016                  |
| Valvular                         | 0.005                   |
| Adult congenital                 | -0.016                  |
| Arrhythmia                       | -0.023                  |
| Constrictive pericarditis        | -0.002                  |
| Other                            | -0.028                  |
| <b>Heart disease</b>             |                         |
| IHD                              | 0.060                   |
| Atrial fibrillation              | 0.014                   |
| <b>Prior procedures</b>          |                         |
| PCI/CABG                         | 0.037                   |
| Pacemaker                        | 0.009                   |
| ICD                              | 0.018                   |
| CRT-D                            | 0.021                   |

|                                 |        |
|---------------------------------|--------|
| Hemodialysis                    | -0.031 |
| Comorbidities                   |        |
| Hypertension                    | -0.004 |
| Diabetes mellitus               | 0.007  |
| Hyperurecemia                   | 0.001  |
| CKD                             | 0.022  |
| Stroke                          | 0.008  |
| PAD                             | 0.002  |
| Anemia                          | 0.015  |
| COPD                            | -0.014 |
| Malignancy                      | 0.020  |
| Echocardiographic data          |        |
| LVEF, %                         | -0.085 |
| LVDd, mm                        | 0.014  |
| LVDs, mm                        | 0.051  |
| LVMI, g/m <sup>2</sup>          | -0.023 |
| LAD, mm                         | -0.013 |
| MR III-IV                       | 0.005  |
| Laboratory data                 |        |
| Hemoglobin, g/dl                | 0.021  |
| Albumin, g/dl                   | -0.019 |
| eGFR, ml/min/1.73m <sup>2</sup> | -0.024 |
| Uric acid, mg/dl                | 0.025  |
| Sodium, mEq/l                   | -0.006 |
| BNP, pg/ml                      | 0.050  |
| ln(BNP)                         | 0.070  |
| Medication                      |        |
| Beta-blocker                    | 0.042  |
| ACEi/ARB                        | 0.015  |
| MRA                             | -0.010 |
| Loop diuretics                  | -0.003 |
| Thiazides                       | -0.006 |

|                    |        |
|--------------------|--------|
| Tolvaptan          | 0.016  |
| Barthel index      |        |
| Independent        | 0.007  |
| Moderately reduced | 0.022  |
| Low                | -0.016 |
| Very low           | -0.009 |

---

1 ACEi, angiotensin-converting-enzyme inhibitor; ARB, angiotensin receptor blocker ;  
2 BMI, body mass index; BNP, brain-type natriuretic peptide; CABG, cardiac artery  
3 bypass grafting; CKD, chronic kidney disease; COPD chronic obstructive pulmonary  
4 disease; CRT-D, cardiac resynchronization therapy-defibrillator; eGFR, estimate  
5 glomerular filtration rate; HF; heart failure; ICD, implantable cardioverter defibrillator;  
6 IHD, ischemic heart disease; LAD, left atrial diameter; LVDD, left ventricular diastolic  
7 diameter; LVDs, left ventricular systolic diameter; LVEF, left ventricular ejection  
8 fraction; LVMI, left ventricular mass index; MR, mitral regurgitation; MRA,  
9 mineralocorticoid receptor antagonist; PAD, peripheral artery disease; PCI,  
10 percutaneous coronary intervention; SBP, systolic blood pressure.

11

1 **Table S6.** Effects of cardiac rehabilitation on malignancy or other non-cardiac death

| Analysis                          | HR (95% CI)         | P value |
|-----------------------------------|---------------------|---------|
| Univariate analysis               | 0.956(0.800-1.143)  | 0.62    |
| Propensity-score matched analysis | 1.039(0.843-1.280)  | 0.72    |
| Multivariable analysis            | 0.971(0.811-1.163)  | 0.75    |
| Multiple imputation analysis      | 0.929 (0.836-1.033) | 0.17    |

2 CI, confidence interval; HR, hazard ratio.
